# Supplementary material for: Evaluating Physical Activity Questionnaires for Postpartum Women
Source: Research Square preprint supplement (doi:10.21203/rs.3.rs-7294077/v1), 2025-10-27
Supplement: Supplementary file 1 [file 837f492fe154992004af3f8a.docx]

**Evaluating Physical Activity Questionnaires for Postpartum Women**

Karan Pongpanit1,2,3,4, Sabrina Belcourt1, Marie Laurance Gagnon1, Brie-Anna Gerardi1,
Kim Tran1, Mariane Bertagnolli1,2,4,*

1 School of Physical and Occupational Therapy, Faculty of Medicine and Health Sciences, McGill University, Montreal, Quebec, Canada

2 Department of Physical Therapy, Faculty of Allied Health Sciences, Thammasat University, Pathum Thani, Thailand

3 Research Center of the Integrated University Health and Social Services Centres (CIUSSS) of the North of Montréal Island, Montreal, Quebec, Canada

4 Cardiovascular Health Across the Lifespan Program, Research Institute of the McGill University Health Centre, Montreal, Quebec, Canada

**Supplemental Materials:**

**Table S.1**

**Table S.2**

**Table S.1** Descriptive pregnancy characteristics of the participants

| Characteristics | Total Participants (N = 23) |
| --- | --- |
| Mean ± SD or n/N (%) |
| Gestational age, weeks  Preterm delivery (<37 weeks) | 39 ± 2  1/23 (4%) |
| Birth weight, grams  Low birth weight (<2,500 gr) | 3,271 ± 562  3/23 (13%) |
| Sex of the fetus  Female  Male | 9/23 (39%)  14/23 (61%) |
| Times pregnant  Primiparous  Multiparous | 8/23 (35%)  15/23 (65%) |
| Pregnancy complications  Depression  Gestational hypertension  Gestational diabetes  Obesity  Hypothyroidism  Anemia  COVID-19 | 9/23 (39%)  3/23 (13%)  1/23 (4%)  2/23 (9%)  1/23 (4%)  2/23 (9%)  3/23 (13%)  5/23 (22%) |
| Pregnancy medications  Antidepressants  Antiemetic  Synthroid  Progesterone  Omeprazol  Iron | 10/23 (44%)  5/23 (22%)  1/23 (4%)  2/23 (9%)  1/23 (4%)  1/23 (4%)  1/23 (4%) |
| Mode of delivery  Vaginal  Cesarean | 19/23 (83%)  4/23 (17%) |
| Days of hospitalization, days | 2 ± 1 |
| Baby complications  Trouble breathing  Jaundice  Slow weight gain  IUGR  Shoulder dystocia | 5/23 (22%)  1/23 (4%)  2/23 (9%)  1/23 (4%)  1/23 (4%)  1/23 (4%) |
| Postpartum complications | 0/23 (0%) |
| Postpartum medications  Antidepressants  Antiemetic  Antibiotics  Synthroid  Iron  Acetaminophen  NSAID  Laxative | 14/34 (61%)  6/23 (26%)  1/23 (4%)  1/23 (4%)  2/23 (9%)  2/23 (9%)  4/23 (17%)  2/23 (9%)  2/23 (9%) |
| Postpartum time, months | 5 ± 3 |

IUGR, intrauterine growth restriction; NSAID, non-steroidal anti-inflammatory drugs

**Table S.2** Access and use of exercise and leisure facilities, public parks, and fitness activities

| Characteristics | Total participants (N = 23) |
| --- | --- |
| Mean ± SD or n/N (%) |
| Access to exercise and leisure facilities  Public  Private  Both | 23/23 (100%)  6/23 (26%)  1/23 (4%)  16/23 (70%) |
| Use of facilities  Yes  No | 14/23 (61%)  9/23 (39%) |
| Frequency of use of facilities  1-2x/week  3x/week  More than 4x/week | 6/14 (43%)  3/14 (21%)  5/14 (36%) |
| Access to public parks | 21/23 (91%) |
| Use of public parks  Yes  No | 19/23 (83%)  4/23 (17%) |
| Frequency of use of public parks  1-2x/week  3x/week  More than 4x/week | 5/19 (26%)  4/19 (21%)  10/19 (53%) |
| Public park activities  Individual  With children  Groups | 12/19 (63%)  5/19 (26%)  2/19 (11%) |
| Have exercise equipment, | 16/23 (70%) |
| Frequency of use of exercise equipment  None  1-2x/week  3x/week  More than 4x/week | 6/16 (38%)  8/16 (50%)  2/16 (12%)  0/23 (0%) |
| Participation in fitness group activities  Individual  With children | 12/23 (52%)  7/12 (58%)  5/12 (42%) |
| Frequency of fitness activities  1-2x/week  3x/week  More than 4x/week | 8/12 (66%)  2/12 (17%)  2/12 (17%) |
